# Supplementary material for: The lipid peroxidation product EKODE exacerbates colonic inflammation and colon tumorigenesis
Source: PubMed Central journal article supplement — Redox Biol. 2021 Jan 27;42:101880. doi: 10.1016/j.redox.2021.101880 (PMC8113040; doi:10.1016/j.redox.2021.101880), 2021-01-27
Supplement: mmc1.pdf [file mmc1.pdf]

**Table S1.** Composition of the diet used in the animal experiment (the diet composition was modified from a standard AIN-93G diet. The ingredients were purchased from Dyets Inc., except corn oil was from a local market in Hadley, MA)

| Ingredients         | grams/kg |
|---------------------|----------|
| Casein              | 200      |
| L-Cystine           | 3        |
| Sucrose             | 100      |
| Dyetrose            | 132      |
| Cornstarch          | 397.5    |
| Cellulose           | 50       |
| Mineral mix #210025 | 35       |
| Vitamin mix #310025 | 10       |
| Choline Bitartrate  | 2.5      |
| Corn oil            | 100      |

**Table S2.** Sequences of primers used in qRT-PCR

| Gene                                 | Forward                  | Reverse                 |
|--------------------------------------|--------------------------|-------------------------|
| Mouse <i>Gapdh</i>                   | AGGTCGGTGTGAACGGATTTG    | TGTAGACCATGTAGTTGAGGTCA |
| Mouse <i>Tnf-<math>\alpha</math></i> | CCCTCACACTCAGATCATCTTCT  | GCTACGACGTGGGCTACAG     |
| Mouse <i>Il-6</i>                    | TAGTCCTTCCCTACCCCAATTTCC | TTGGTCCTTAGCCACTCCTTC   |
| Mouse <i>Ifn-<math>\gamma</math></i> | ATGAACGCTACACACTGCATC    | CCATCCTTTTGCCAGTTCCTC   |
| Mouse <i>Jun</i>                     | CCTTCTACGACGATGCCCTC     | GGTTCAAGGTCATGCTCTGTTT  |
| Mouse <i>Il-10</i>                   | GCTCTTACTGACTGGCATGAG    | CGCAGCTCTAGGAGCATGTG    |
| Mouse <i>Il-1<math>\beta</math></i>  | GCAACTGTTCTGAACTCAACT    | ATCTTTTGGGGTCCGTCAACT   |
| Mouse <i>Mcp-1</i>                   | TTAAAAACCTGGATCGGAACCAA  | GCATTAGCTTCAGATTTACGGGT |
| Mouse <i>Mki67</i>                   | ATCATTGACCGCTCCTTTAGGT   | GCTCGCCTTGATGGTTCCT     |
| Mouse <i>Pcna</i>                    | TTTGAGGCACGCCTGATCC      | GGAGACGTGAGACGAGTCCAT   |
| Mouse <i>Ccnd-1</i>                  | GCGTACCCTGACACCAATCTC    | CTCCTCTTCGCACTTCTGCTC   |
| Mouse <i>Occludin</i>                | ACGGACCCTGACCACTATGA     | TCAGCAGCAGCCATGTACTC    |
| Mouse <i>Vegf</i>                    | GCACATAGAGAGAATGAGCTTCC  | CTCCGCTCTGAACAAGGCT     |
| Mouse <i>Myc</i>                     | TGAAGTTCACGTTGAGGGG      | AGAGCTCCTCGAGCTGTTTG    |
| Mouse <i>Mpo</i>                     | GACATGCCACCGAATGACAA     | CAGGCAACCAGCGTACAAAG    |
| Mouse <i>Gsta1</i>                   | GAGCCATTCTCAACTACATCG    | TGCCCAATCATTTCAGTCAG    |
| Mouse <i>Gstm1</i>                   | GGTGACGCTCCCGACTT        | TTGCTCTGGGTGATCTTGT     |
| Mouse <i>Cat</i>                     | TGGCACACTTTGACAGAGAGC    | CCTTTGCCTTGGAGTATCTGG   |
| Mouse <i>Sod1</i>                    | AACCAGTTGTGTTGTCAGGAC    | CCACCATGTTTCTTAGAGTGAGG |
| Mouse <i>Gsr</i>                     | GACACCTCTTCTTCGACTACC    | CACATCCAACATTACGCAAG    |
| Mouse <i>Homx1</i>                   | AAGCCGAGAATGCTGAGTTCA    | GCCGTGTAGATATGGTACAAGGA |
| Human <i>IL-6</i>                    | GCACTGGCAGAAAACAACCT     | CAGGGGTGGTTATTGCATCT    |
| Human <i>TNF-<math>\alpha</math></i> | CCGTCTCCTACCAGACCAAGG    | CTGGAAGACCCCTCCAGATAG   |
| Human <i>IFN-<math>\gamma</math></i> | TCGGTAACTGACTTGAATGTCCA  | TCGCTTCCCTGTTTTAGCTGC   |
| Human <i>GAPDH</i>                   | ACAACCTTTGGTATCGTGGAAGG  | GCCATCACGCCACAGTTTC     |
| 16S rRNA                             | CCTACGGGTGGCTGCAG        | GACTACTAGGGTATCTAATCC   |

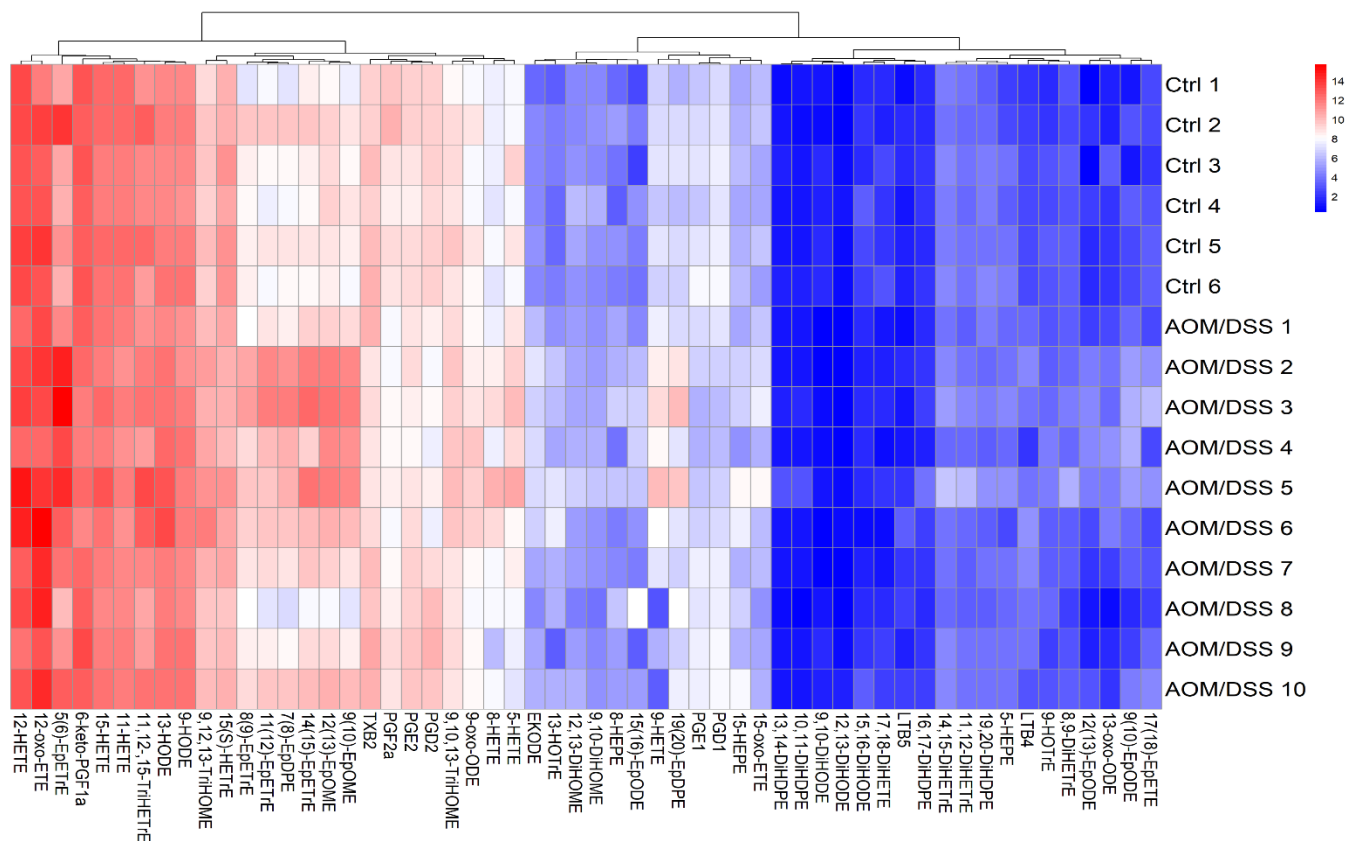

**Figure S1.** Heat-map analysis of lipids in the colon of AOM/DSS-induced CRC mice (n = 10 mice per group) vs. control healthy mice (n = 6 mice per group).

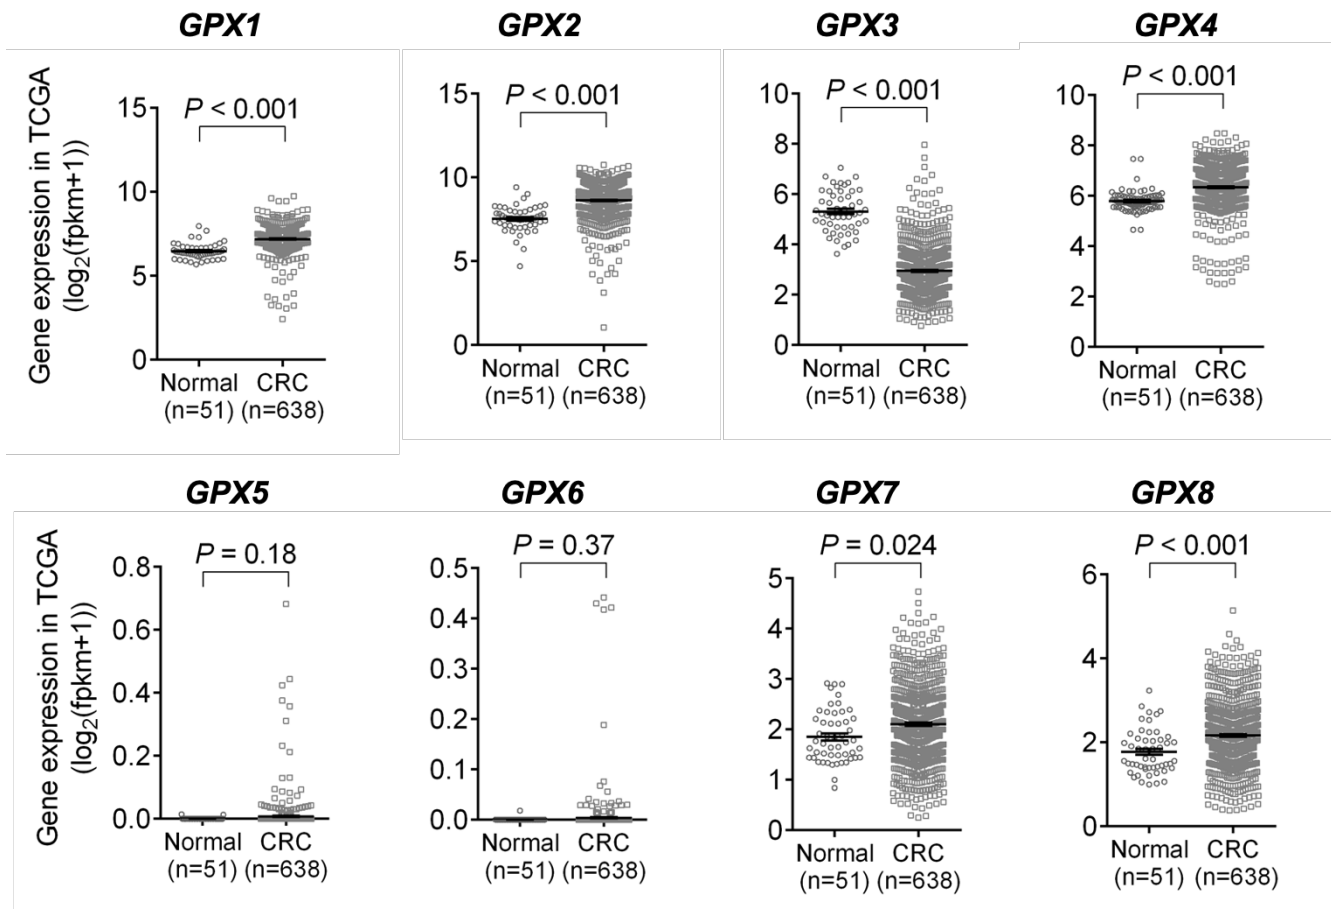

**Figure S2.** Expression of GPX in the TCGA database. The results are mean  $\pm$  SEM. The statistical significance of two groups was determined using Student's t test or Wilcoxon-Mann-Whitney test.

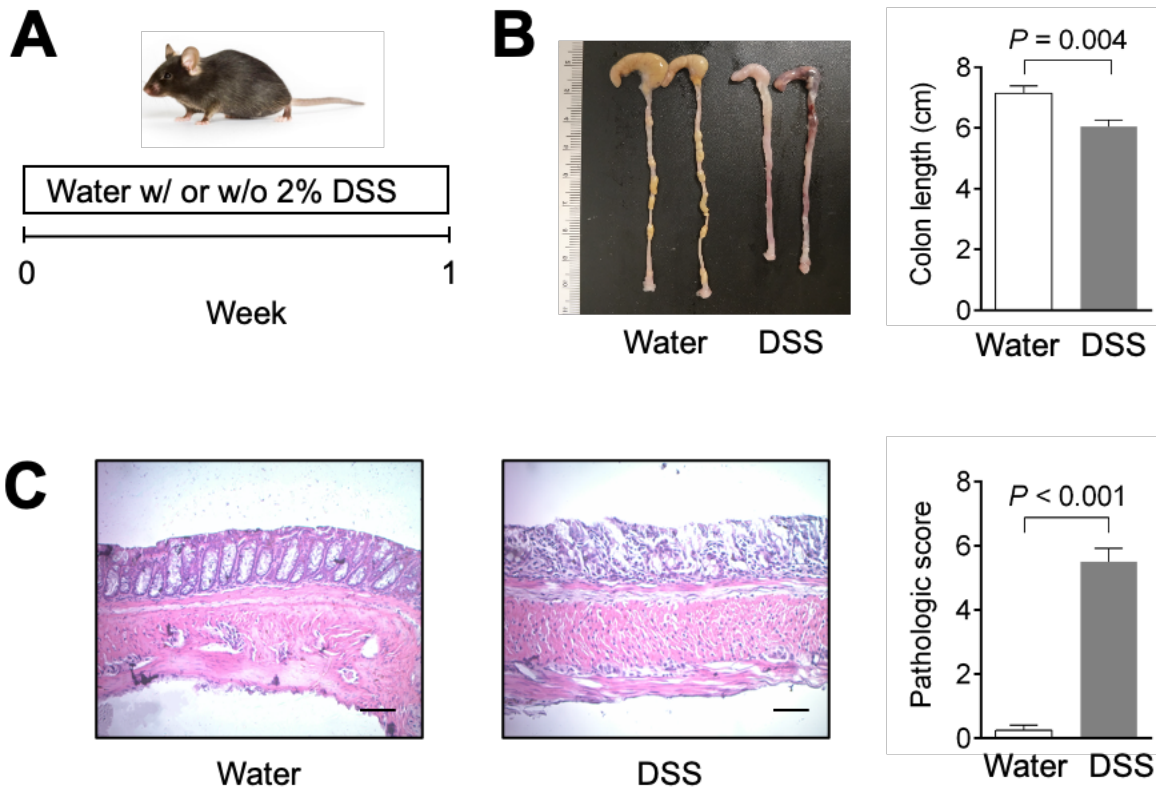

**Figure S3.** Compared with the mice treated with normal drinking water, the mice treated with DSS developed acute colitis. **A**, Scheme of animal experiment. **B**, Colon length (n = 8 mice per group). **C**, H&E staining of colon (n = 8 mice per group, scale bars: 50  $\mu$ m). The results are mean  $\pm$  SEM.

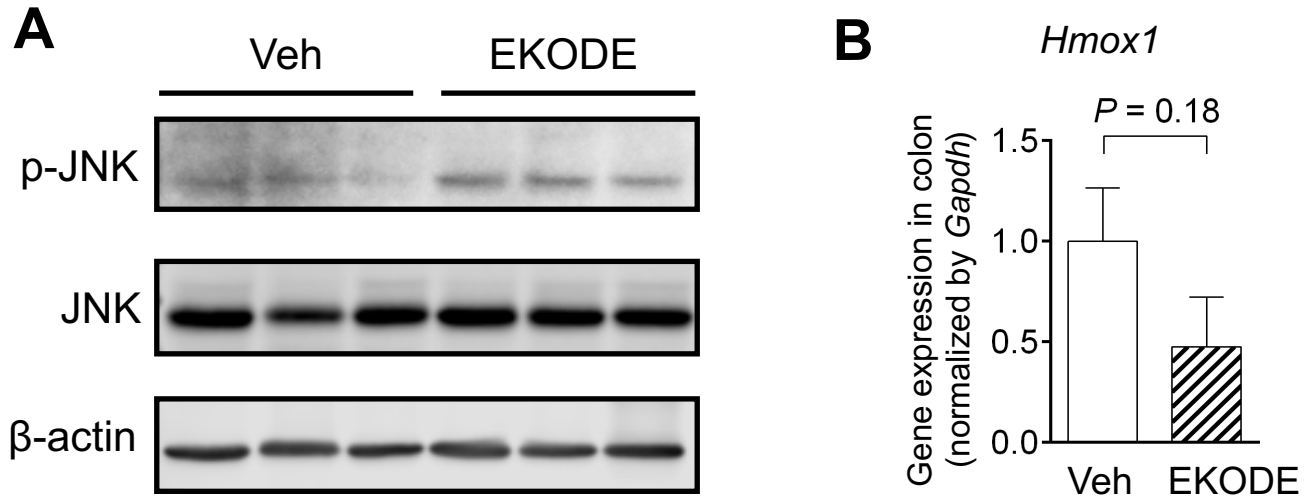

**Figure S4.** Effects of EKODE on (A) colonic expression of phosphorylated JNK (n = 3 per group), and (B) gene expression of *Hmox1* in colon (n = 6-7 per group), in the DSS-induced colitis model in mice. The results are mean  $\pm$  SEM.

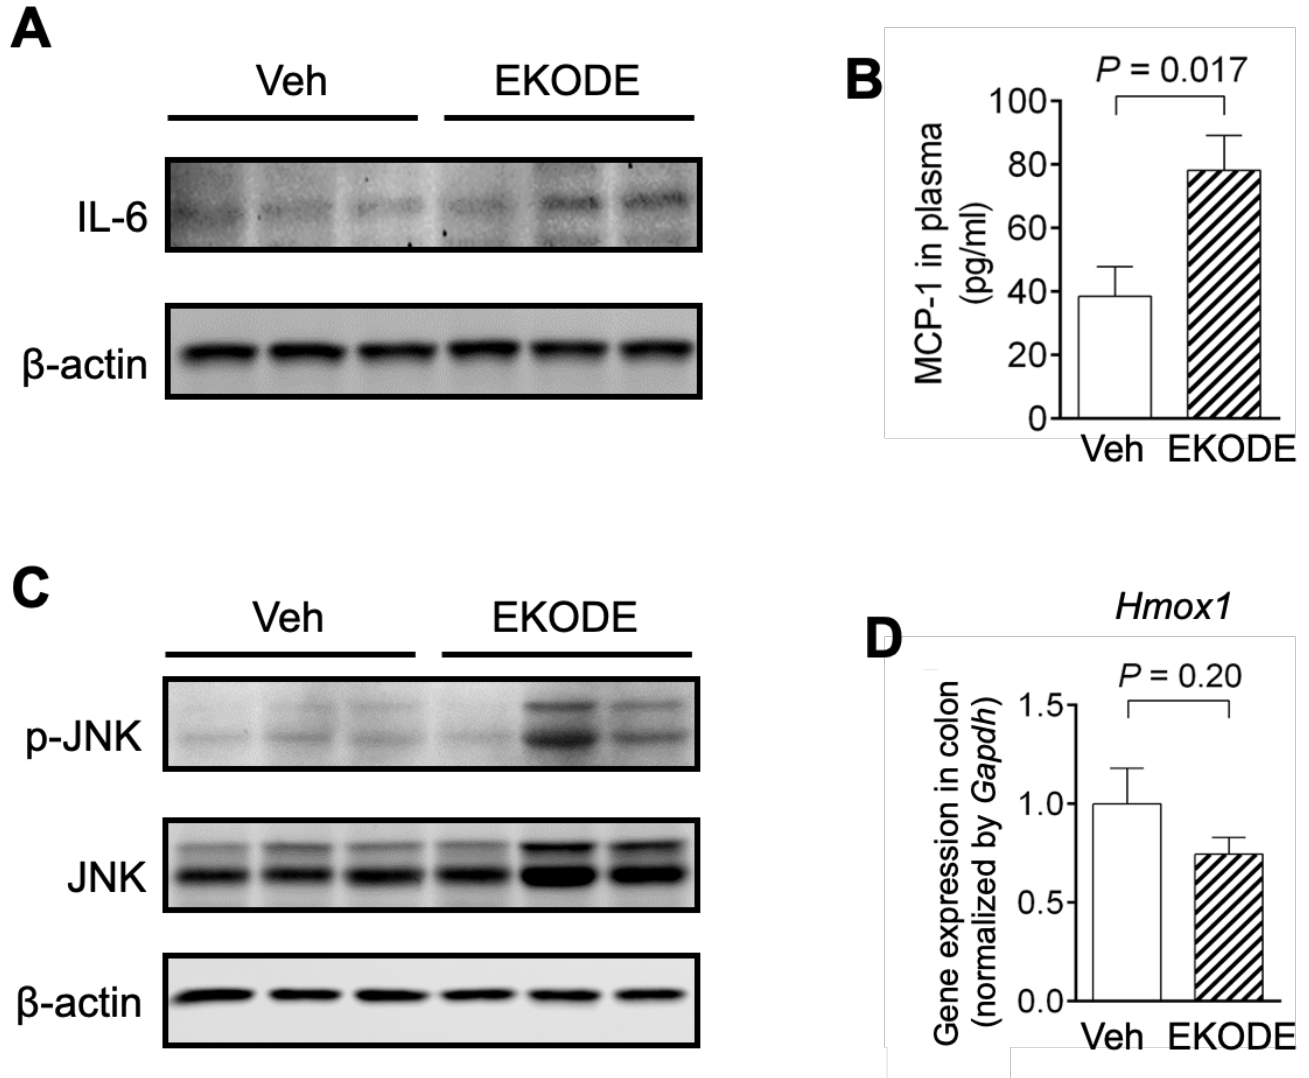

**Figure S5.** Effects of EKODE on (A) colonic expression of IL-6 (n = 3 per group), (B) plasma concentration of MCP-1 (n = 7-8 per group), (C) colonic expression of phosphorylated JNK (n = 3 per group), and (D) gene expression of *Hmox1* in colon (n = 7-8 per group), in the AOM/DSS-induced CRC model in mice. The results are mean  $\pm$  SEM.

*Hmox1* expression in  
RAW 264.7 cells

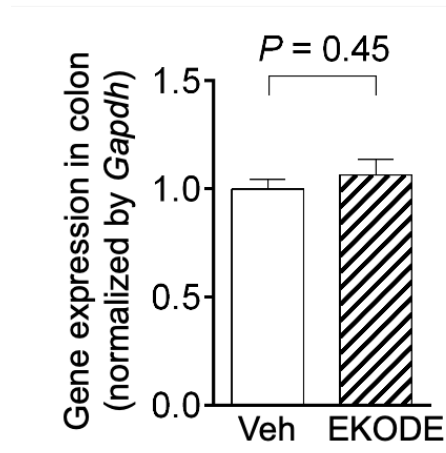

**Figure S6.** Effects of 24-h treatment with 300 nM EKODE on expression of *Hmox1* in RAW 264.7 cells (n = 6 per group).
